# Supplementary material for: Myeloid Cell-Derived IL-1 Signaling Damps Neuregulin-1 from Fibroblasts to Suppress Colitis-Induced Early Repair of the Intestinal Epithelium
Source: MDPI journal article supplement (doi:10.3390/ijms25084469), 2024-04-18
Supplement: s1 [file s1]

**Table S1.** Primer sequences

|               |   |                         |
|---------------|---|-------------------------|
| <i>Pdgfra</i> | F | CAAGCAGTGTGCTCCCTAAGT   |
|               | R | CACCGGGCAAGCAATATAC     |
| <i>Il1r1</i>  | F | GTGCTACTGGGGCTCATTGT    |
|               | R | GGAGTAAGAGGACACTTGCGAAT |
| <i>Nrg1</i>   | F | ATGGAGATTATCCCCCAGACA   |
|               | R | GTTGAGGCACCCTCTGAGAC    |
| <i>Gapdh</i>  | F | TTCACCACCATGGAGAAGGC    |
|               | R | GGCATGGACTGTGGTCATGA    |
